# Supplementary material for: Cytochalasin B Treatment and Osmotic Pressure Enhance the Production of Extracellular Vesicles (EVs) with Improved Drug Loading Capacity
Source: MDPI journal article supplement (doi:10.3390/nano12010003), 2021-12-21
Supplement: s1 [file s1]

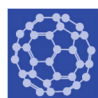

## Supplementary Materials

# Cytochalasin B Treatment and Osmotic Pressure Enhance the Production of Extracellular Vesicles (EVs) with Improved Drug Loading Capacity

Ashita Nair <sup>1,2,†</sup>, Jiyeon Bu <sup>1,2,†</sup>, Piper A. Rawding <sup>1,2</sup>, Steven C. Do <sup>1</sup>, Hangpeng Li <sup>1</sup> and Seungpyo Hong <sup>1,2,3,4,\*</sup>

<sup>1</sup> Division of Pharmaceutical Sciences, School of Pharmacy, University of Wisconsin, Madison, WI 53705, USA; anair23@wisc.edu (A.N.); bu6@wisc.edu (J.B.); rawding@wisc.edu (P.A.R.); scdo@wisc.edu (S.C.D.); hli578@wisc.edu (H.L.)

<sup>2</sup> Wisconsin Center for NanoBioSystems (WisCNano), School of Pharmacy, The University of Wisconsin-Madison, 777 Highland Ave., Madison, WI 53705, USA

<sup>3</sup> Department of Biomedical Engineering, College of Engineering, University of Wisconsin, Madison, WI 53706, USA

<sup>4</sup> Yonsei Frontier Lab, Department of Pharmacy, Yonsei University, Seoul 03722, Korea

\* Correspondence: seungpyo.hong@wisc.edu

† A Nair and J Bu contributed equally to this work.

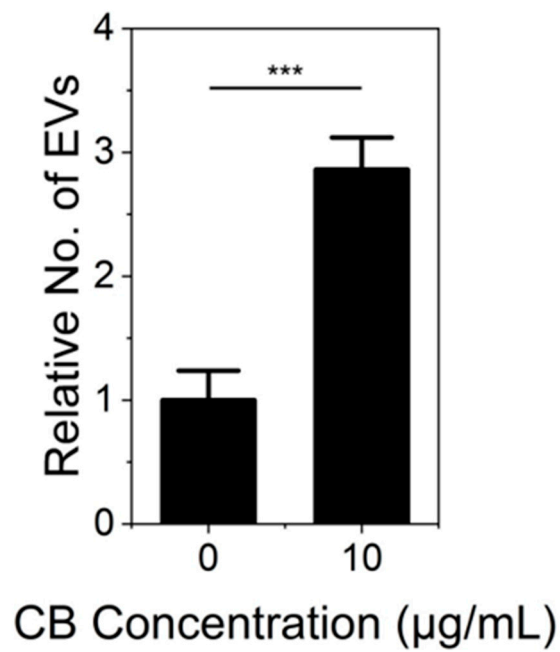

**Figure S1.** EVs obtained from MCF-7 cells at CB concentrations of 0 and 10 µg/mL. \*\*\*p < 0.001.

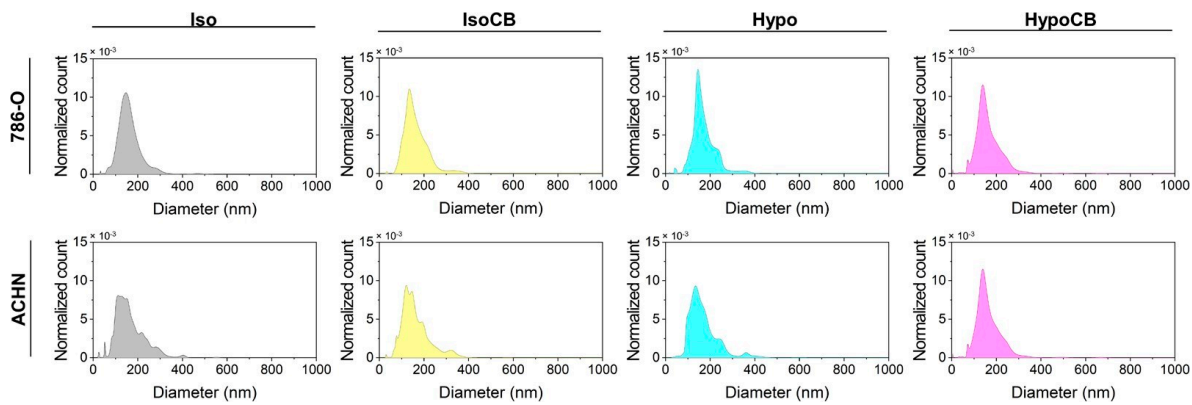

**Figure S2.** Size distribution of the produced EVs, which include naïve EVs (grey), CIMVs (yellow), Hypo-EVs (cyan), and Hypo-CIMVs (pink).

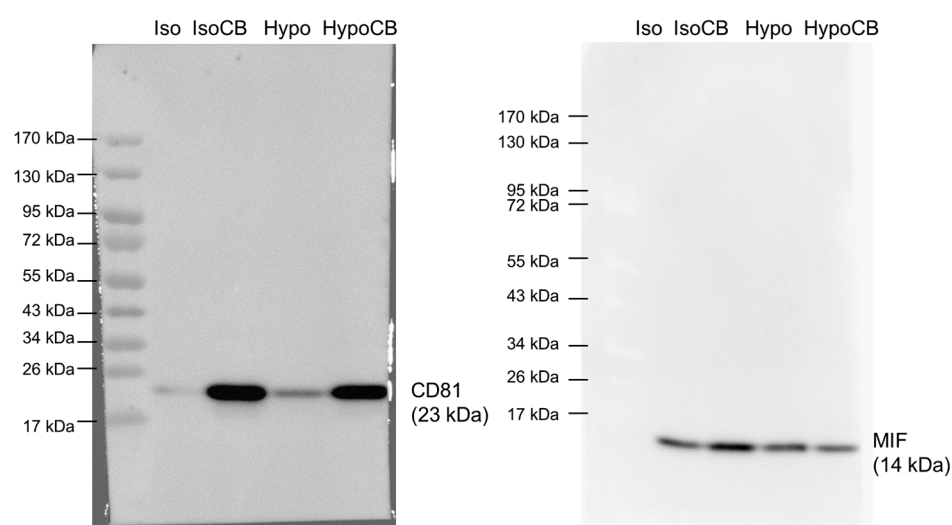

**Figure S3.** The whole Western Blot membrane images.

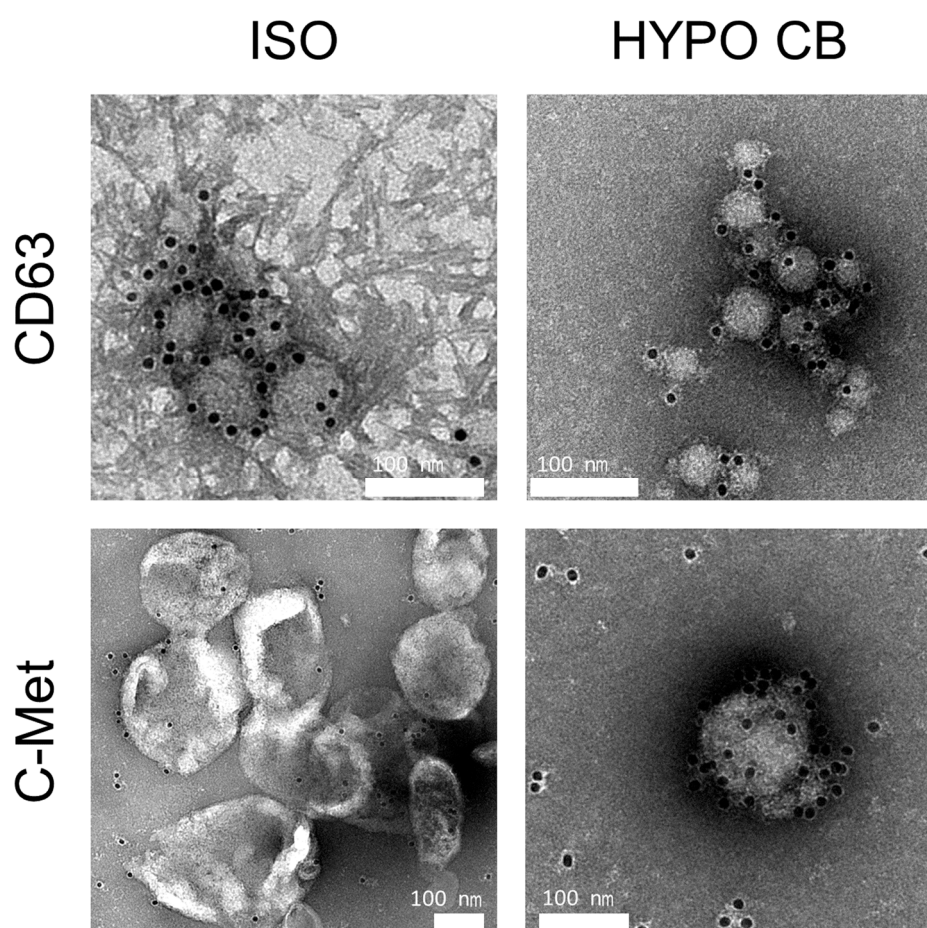

**Figure S4.** Immunogold TEM images for assessing CD63 and C-Met expressions on EVs.

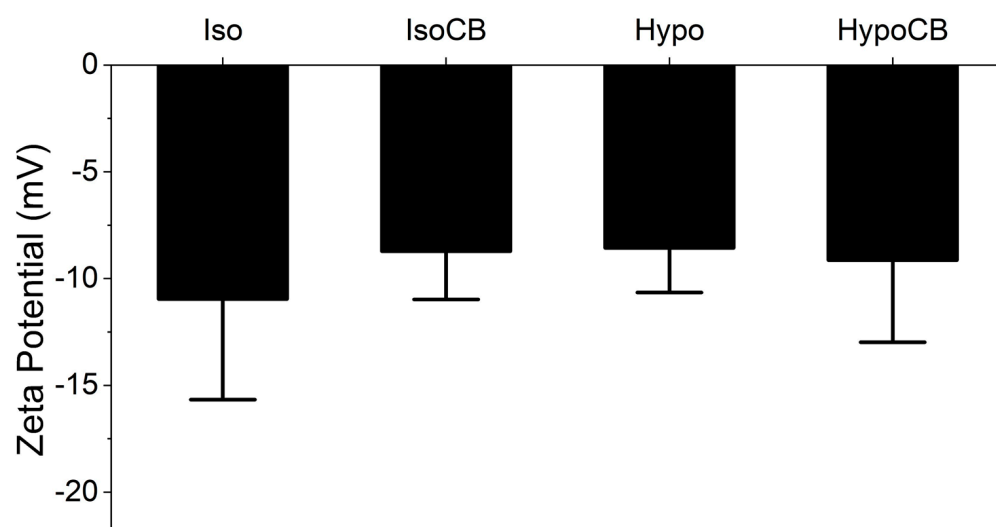

Figure S5. Zeta potential measurements of the EVs produced at different cell incubation conditions.

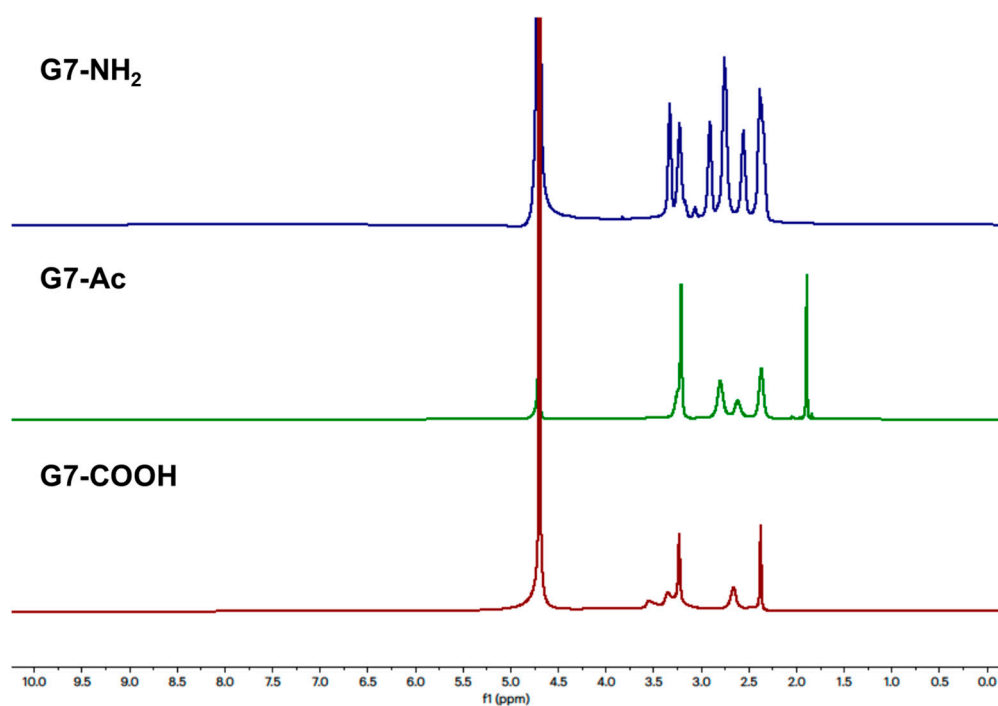

Figure S6. <sup>1</sup>H NMR spectra of surface-modified G7 PAMAM dendrimers.

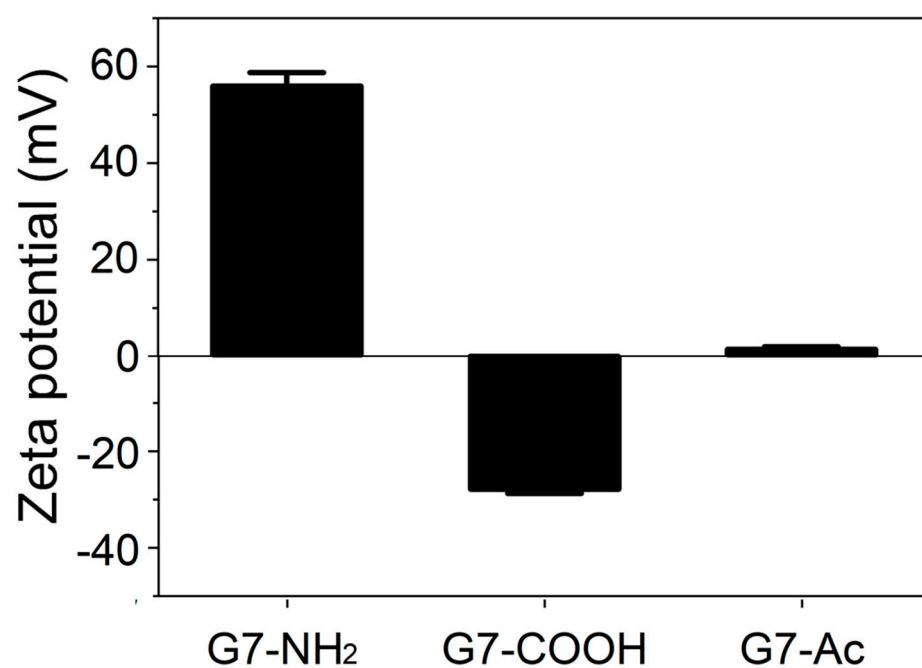

Figure S7. Zeta potential measurements of surface-modified G7 PAMAM dendrimers.

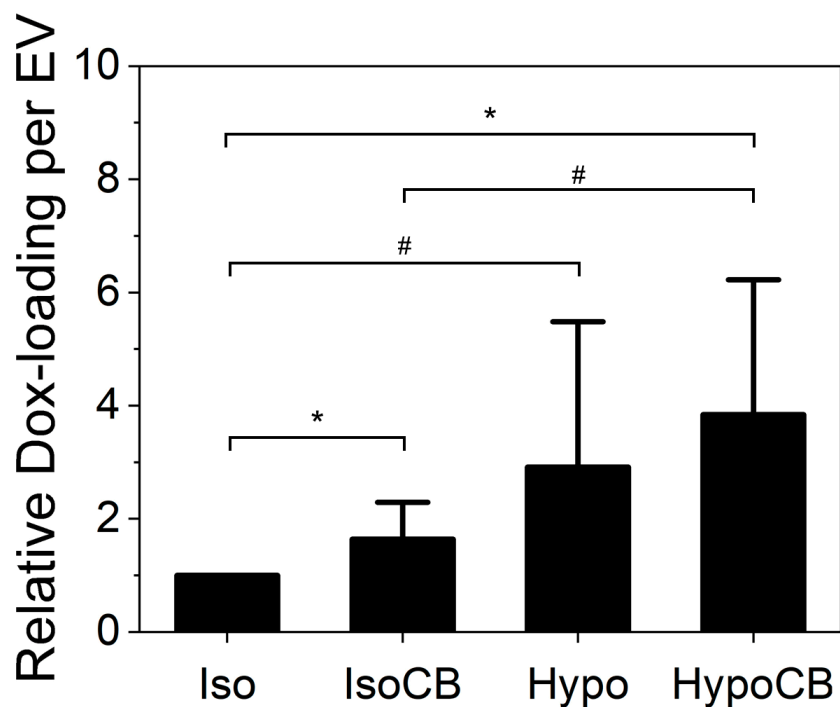

Figure S8. Relative Dox-loading efficiency of the EVs produced at different cell incubation conditions. Significance levels are indicated as #p < 0.10, \*p < 0.05, compared to the EVs obtained from non-CB treated cells.
